# Supplementary material
Source: publisher figshare collection journal article supplement (https://acs.figshare.com/ndownloader/files/5525255)
Supplement: Supplementary file 1 [file 5525255]

## SUPPORTING INFORMATION

### Investigation of Solute-Fiber Affinity and Orientational Ordering of Norbornadiene Interacting with Two-polypeptide Chiral Liquid Crystalline Solvents by NAD NMR

Zeinab Serhan, Christie Aroulanda and Philippe Lesot\*

*RMN en Milieu Orienté, ICMMO, UMR CNRS 8182, Université de Paris Sud / Université Paris-Saclay, Bât. 410, F-91405 Orsay cedex, France.*

**Corresponding author:** Philippe Lesot. E-mail: [philippe.lesot@u-psud.fr](mailto:philippe.lesot@u-psud.fr). Phone: +33 (0)1 69 15 47 59 / Fax: +33 (0)1 69 15 81 05

#### Index of Electronic Supporting Information

#### I. FURTHER TABLES

##### I.1. General Tables

**Table S1.** Mass fraction (w/w%) of polypeptide and associated peptide unit fraction ( $x^{\text{pu}}\%$ )

**Table S2.** Atomic coordinates of **NBD** defined into the selected IAS.

##### I.2. Data relative to **NBD** (Series I – 100 mg and Series II – 10 mg)

**Table S3.** Experimental values of  $\Delta\nu_Q$ 's of **NBD** and associated fit parameters (Series I).

**Table S4.** Experimental values and back-calculated values of  $\Delta\nu_Q$  of **NBD** and associated rms (Series I).

**Table S5.** Experimental values of  $\Delta\nu_Q$ 's of **NBD** and fit parameters (Series II).

**Table S6.** Experimental values and back-calculated values of  $\Delta\nu_Q$ 's of **NBD** and associated rms (Series II).

#### II. FURTHER FIGURES

**Figure S1.** Tilted 92 MHz NAD *Q*-COSY Fz 2D map of **NBD** in PBLG/DMF and PCBL/DMF mesophases.

**Figure S2.** Variation of  $\Delta\nu_Q$ 's for all  $^2\text{H}$  sites of **NBD** versus  $\%x^{\text{pu}}$ (PBLG) (Series I).

**Figure S3.** Flow chart showing the three-step analytical procedure adopted for the analysis of **NBD** dissolved in polypeptide mesophases through NAD 2D NMR (Series I).

**Figure S4.** Variation of  $\Delta\nu_Q$ 's for all  $^2\text{H}$  sites of **NBD** versus  $\%x^{\text{pu}}$ (PBLG) (Series II).

**Figure S5.** Comparison between Series I and Series II of diagonalised order parameters,  $S_{\text{a'a'}}$ ,  $S_{\text{b'b'}}$  and  $S_{\text{c'c'}}$ , of **NBD** versus  $\%x^{\text{pu}}$ (PBLG).

## I. FURTHER TABLES

### I.1. General Tables

**Table S1.** Mass fraction (m/m%) of polypeptide and associated peptide unit fraction ( $x^{\text{pu}}\%$ ) used for Series I and II

| Series <sup>a</sup> | $m/m_{\text{T}}(\text{PBLG}) / \%$ | $m/m_{\text{T}}(\text{PCBLL}) / \%$ | $x^{\text{up}}(\text{PBLG}) / \%$ <sup>b</sup> | $x^{\text{up}}(\text{PCBLL}) / \%$ <sup>b</sup> |
|---------------------|------------------------------------|-------------------------------------|------------------------------------------------|-------------------------------------------------|
| I and II            | 0                                  | 100                                 | 0.000                                          | 100.000                                         |
| I                   | 25                                 | 75                                  | 28.509                                         | 71.491                                          |
| I and II            | 50                                 | 50                                  | 54.470                                         | 45.530                                          |
| I                   | 75                                 | 25                                  | 78.209                                         | 21.791                                          |
| I and II            | 100                                | 0                                   | 100.000                                        | 0.000                                           |

<sup>a</sup>In Series I and II, the mass of solute is 100 and 10 mg, respectively. <sup>b</sup>The conversion from  $m/m_{\text{T}}(\text{PBLG})$  to  $x^{\text{up}}(\text{PBLG})$  is given in Eq. 6.

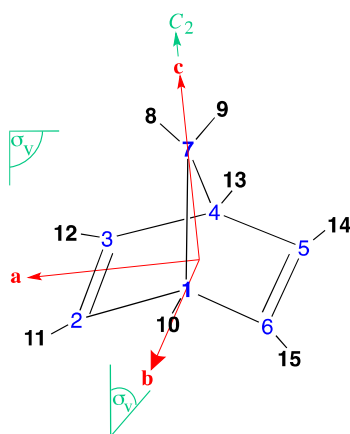

**Table S2.** Molecular atomic coordinates (Å) determined by Hyperchem 6.0, according to the atomic numbering chosen

|     | a       | b       | c       |
|-----|---------|---------|---------|
| C1  | +0.0000 | +1.1319 | +0.2792 |
| C2  | +1.2102 | +0.6734 | -0.5322 |
| C3  | +1.2102 | -0.6734 | -0.5322 |
| C4  | +0.0000 | -1.1319 | +0.2792 |
| C5  | -1.2102 | -0.6734 | -0.5322 |
| C6  | -1.2102 | +0.6734 | -0.5322 |
| C7  | +0.0000 | +0.0000 | +1.3634 |
| H8  | +0.8877 | +0.0000 | +2.0136 |
| H9  | -0.8877 | +0.0000 | +2.0136 |
| H10 | +0.0000 | +2.1767 | +0.6234 |
| H11 | +1.9038 | +1.3600 | -1.0084 |
| H12 | +1.9038 | -1.3600 | -1.0084 |
| H13 | +0.0000 | -2.1767 | +0.6234 |
| H14 | -1.9038 | -1.3600 | -1.0084 |
| H15 | -1.9038 | +1.3600 | -1.0084 |

## I.2. Data relative to NBD (Series I – 100 mg)

**Table S3.** Experimental values (with sign) of RQC's of NBD and fit parameters (Series I)

| <sup>2</sup> H Sites <sup>a</sup><br>( $\delta$ decreasing) <sup>b</sup> | $\Delta\nu_Q$ (in Hz) versus %m(PBLG) <sup>d</sup> |                     |                     |                     |                     | Fit parameters      |                |
|--------------------------------------------------------------------------|----------------------------------------------------|---------------------|---------------------|---------------------|---------------------|---------------------|----------------|
|                                                                          | 0%                                                 | 25%                 | 50%                 | 75%                 | 100%                | K <sup>e</sup>      | R <sup>f</sup> |
| C=C (11/14, 12/15)                                                       | +12 $\pm$ 2<br>(●)                                 | +38 $\pm$ 2<br>(●)  | +65 $\pm$ 2<br>(●)  | +89 $\pm$ 2<br>(●)  | +114 $\pm$ 2<br>(●) | 0.87(9) $\pm$ 0.01  | 0.99993        |
| C=C (12/15, 11/14)                                                       | +112 $\pm$ 2<br>(○)                                | +44 $\pm$ 2<br>(○)  | -23 $\pm$ 2<br>(○)  | -89 $\pm$ 2<br>(○)  | -152 $\pm$ 2<br>(○) | 0.87(7) $\pm$ 0.01  | 0.99994        |
| C=C (aver) <sup>c</sup>                                                  | +62 $\pm$ 2                                        | +41 $\pm$ 2         | +21 $\pm$ 2         | 0 $\pm$ 2           | -19 $\pm$ 2         | 0.875 $\pm$ 0.004   | 0.99999        |
| Bridgehead (10/13)                                                       | -71 $\pm$ 2<br>(+)                                 | -140 $\pm$ 3<br>(+) | -208 $\pm$ 2<br>(+) | -274 $\pm$ 3<br>(+) | -338 $\pm$ 3<br>(+) | 0.87(9) $\pm$ 0.002 | 1.00000        |
| Bridge (8/9)                                                             | +137 $\pm$ 2<br>(×)                                | +159 $\pm$ 3<br>(×) | +180 $\pm$ 2<br>(×) | +200 $\pm$ 3<br>(×) | +221 $\pm$ 3<br>(×) | 0.86(9) $\pm$ 0.01  | 0.99994        |

<sup>a</sup>See **Figure 1a**. <sup>b</sup>The <sup>2</sup>H sites are ranked from deshielded to shielded ones (see **Figure 1b**). <sup>c</sup>Average of  $\Delta\nu_Q$ 's (associated to enantiotopic directions). This is the value that would be expected when recording NAD spectrum in the achiral mesophase «PBG/PCBL». <sup>d</sup>RQC's with negative sign are underlined. The labels in parenthesis correspond to those uses in plots of **Figure 2** and **Figures S2**. <sup>e</sup>K: Distribution coefficient (see **Eq. 3**). <sup>f</sup>R: Regression coefficient of fit.

**Table S4.** Experimental and back-calculated values of RQC's (in Hz) of **NBD** (Series I)

| Sites <sup>a</sup>                | $\Delta\nu_Q(\text{exp})$ and $\Delta\nu_Q(\text{cal})$ versus %m(PBLG) |          |          |          |          |
|-----------------------------------|-------------------------------------------------------------------------|----------|----------|----------|----------|
|                                   | 0%                                                                      | 25%      | 50%      | 75%      | 100%     |
| C=C (11/14) <sup>exp</sup>        | +12 ± 2                                                                 | +38 ± 2  | +65 ± 2  | +89 ± 2  | +114 ± 2 |
| C=C (11/14) <sup>cal</sup>        | 18.2                                                                    | 42.7     | 67.8     | 90.2     | 113.8    |
| Symbol <sup>c</sup>               | (●)                                                                     | (●)      | (●)      | (●)      | (●)      |
| C=C (12/15) <sup>exp</sup>        | +112 ± 2                                                                | +44 ± 2  | -23 ± 2  | -89 ± 2  | -152 ± 2 |
| C=C (12/15) <sup>cal</sup>        | +118.2                                                                  | +48.7    | -20.2    | -87.7    | -152.2   |
| Symbol                            | (○)                                                                     | (○)      | (○)      | (○)      | (○)      |
| Bridgehead (10/13) <sup>exp</sup> | -71 ± 2                                                                 | -140 ± 3 | -208 ± 2 | -274 ± 3 | -338 ± 3 |
| Bridgehead(10/13) <sup>cal</sup>  | -80.0                                                                   | -146.7   | -212.0   | -275.8   | -337.7   |
| Symbol                            | (+)                                                                     | (+)      | (+)      | (+)      | (+)      |
| Bridge (8/9) <sup>exp</sup>       | +137 ± 2                                                                | +159 ± 3 | +180 ± 2 | +200 ± 3 | +221 ± 3 |
| Bridge (8/9) <sup>cal</sup>       | +124.4                                                                  | +149.6   | +174.4   | +197.5   | +221.4   |
| Symbol                            | (×)                                                                     | (×)      | (×)      | (×)      | (×)      |
| Rms <sup>b</sup>                  | 8.9                                                                     | 6.7      | 4.0      | 1.8      | 0.3      |

<sup>a</sup>See **Figures 1a** and **SI-1a**. <sup>b</sup>Rms : root mean square obtained assuming  $\text{QCC}(\text{sp}^2) = 185 \text{ kHz}$ ,  $\text{QCC}(\text{sp}^3) = 170 \text{ kHz}$ .

<sup>c</sup>The labels in parenthesis correspond to those used in **Figure 1** and **Figure SI-2**.

**Table S5.** Experimental values (with sign) of RQC's (in Hz) of **NBD** and fit parameters (Series II)

| <sup>2</sup> H Sites <sup>a</sup><br>( $\delta$ decreasing) <sup>b</sup> | $\Delta\nu_Q$ versus %m(PBLG) <sup>d</sup> |                 |                 | Fit parameters |                |
|--------------------------------------------------------------------------|--------------------------------------------|-----------------|-----------------|----------------|----------------|
|                                                                          | 0%                                         | 50%             | 100%            | K <sup>e</sup> | R <sup>f</sup> |
| C=C (11/14, 12/15)                                                       | +14 ± 2<br>(●)                             | +71 ± 2<br>(●)  | +126 ± 2<br>(●) | 0.86(6) ± 0.01 | 1              |
| C=C (12/15, 11/14)                                                       | +134 ± 2<br>(○)                            | -19 ± 2<br>(○)  | -166 ± 2<br>(○) | 0.87(0) ± 0.01 | 1              |
| C=C (aver) <sup>c</sup>                                                  | +74 ± 2                                    | +26 ± 2         | -20 ± 2         | 0.87(2) ± 0.01 | 1              |
| Bridgehead (10/13)                                                       | -43 ± 2<br>(+)                             | -207 ± 2<br>(+) | -365 ± 3<br>(+) | 0.86(8) ± 0.01 | 1              |
| Bridge (8/9)                                                             | +130 ± 2<br>(×)                            | +186 ± 2<br>(×) | +240 ± 3<br>(×) | 0.86(7) ± 0.01 | 1              |

<sup>a</sup>See **Figure 1a**. <sup>b</sup>The <sup>2</sup>H sites are ranked from deshielded to shielded ones (see **Figure 5**). <sup>c</sup>Average of  $\Delta\nu_Q$ 's (relative to enantiotopic directions). This is the value that would be expected when recording NAD spectrum in the mesophase achiral «PBG/PCBL». <sup>d</sup>RQC's with negative sign are underlined. The labels in parenthesis correspond to those uses in plots of **Figures SI-4**. <sup>e</sup>K: Distribution coefficient (see **Eq. 3**). <sup>f</sup>R: Regression coefficient of fit. As only three experimental points are available, R = 1.

**Table S6.** Experimental and back-calculated values of RQC's (in Hz) of **NBD** in Hz and associated rms (Series II)

| Sites <sup>a</sup>                | $\Delta\nu_Q(\text{exp})$ and $\Delta\nu_Q(\text{cal})$ versus %m(PBLG) |          |          |
|-----------------------------------|-------------------------------------------------------------------------|----------|----------|
|                                   | 0%                                                                      | 50%      | 100%     |
| C=C (11/14) <sup>exp</sup>        | +14 ± 2                                                                 | +71 ± 2  | +126 ± 2 |
| C=C (11/14) <sup>cal</sup>        | +20.5                                                                   | +74.2    | +126.0   |
| Symbol                            | (●) <sup>c</sup>                                                        | (●)      | (●)      |
| C=C (12/15) <sup>exp</sup>        | +134 ± 2                                                                | -19 ± 2  | -166 ± 2 |
| C=C (12/15) <sup>cal</sup>        | +140.5                                                                  | -15.8    | -166.0   |
| Symbol                            | (○)                                                                     | (○)      | (○)      |
| Bridgehead (10/13) <sup>exp</sup> | -43 ± 2                                                                 | -207 ± 2 | -365 ± 3 |
| Bridgehead (10/13) <sup>cal</sup> | -52.4                                                                   | -211.6   | -365.0   |
| Symbol                            | (+)                                                                     | (+)      | (+)      |
| Bridge (8/9) <sup>exp</sup>       | +130 ± 2                                                                | +186 ± 2 | +240 ± 3 |
| Bridge (8/9) <sup>cal</sup>       | +116.9                                                                  | +179.5   | +240.0   |
| Symbol                            | (×)                                                                     | (×)      | (×)      |
| rms <sup>b</sup>                  | 9.3                                                                     | 4.6      | 0.01     |

<sup>a</sup>See **Figures 1a** and **SI-1a**. <sup>b</sup>Rms : root mean square obtained assuming QCC(sp<sup>2</sup>) = 185 kHz, QCC(sp<sup>3</sup>) = 170 kHz.

<sup>c</sup>The labels in parenthesis correspond to those used in **Figure 5** and graphs of **Figures S4**.

## II. FURTHER FIGURES

### II.1. Figures relative to Series I (100 mg)

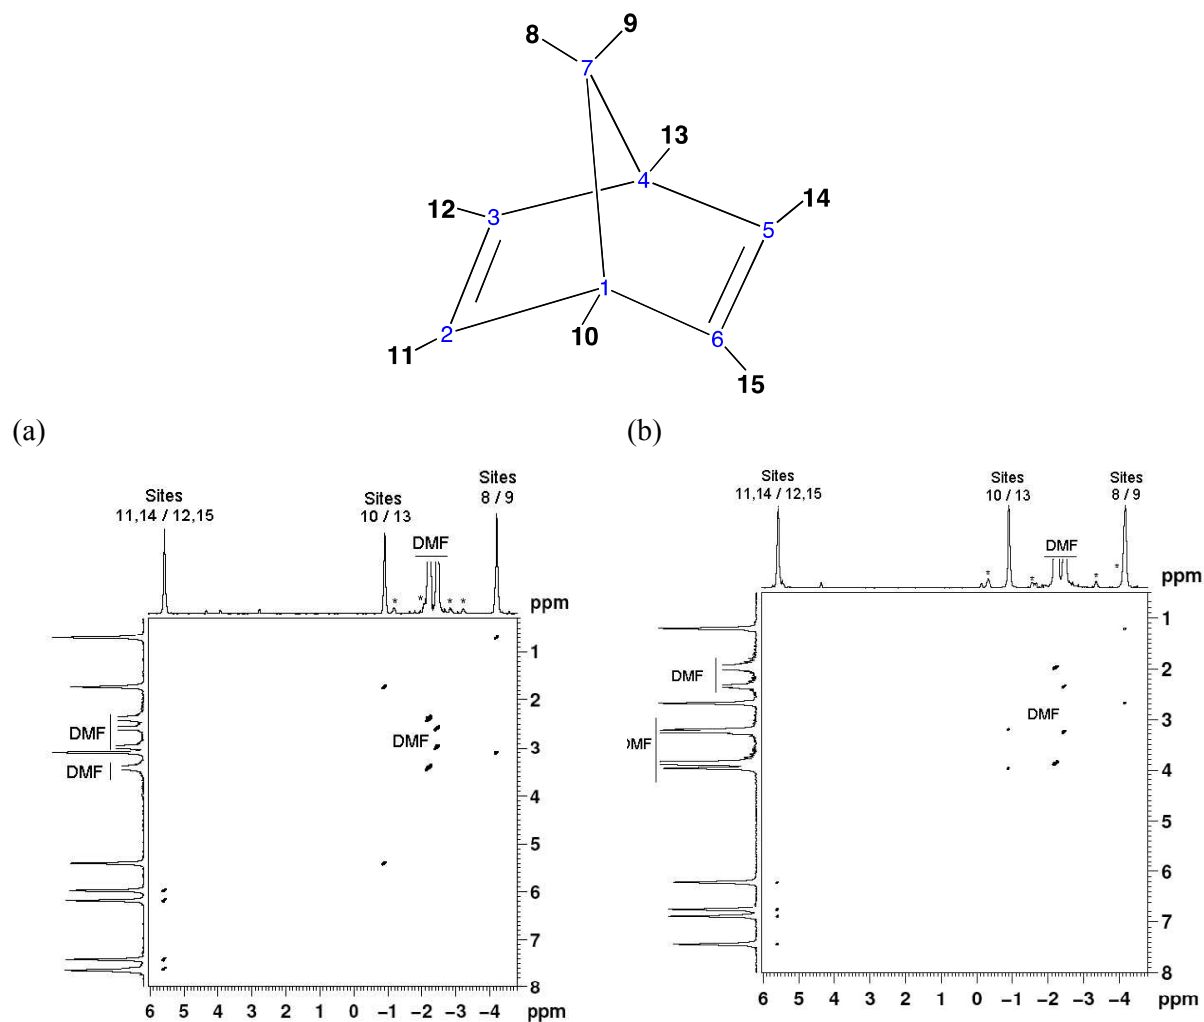

**Figure S1.** Tilted 92 MHz NAD 2D  $Q$ -COSY  $F_z$  map of **NBD** (Series I) in PBLG/DMF (a) and PCBL/DMF mesophases (b) at 305 K. Peaks marked by an asterisk on  $F_2$  projection are associated to residual NAD diagonal peaks of DMF. Scale of the horizontal axis ( $F_2$ ) has no spectral meaning. Doublets of DMF were used to calibrate the 2D spectrum. As expected, the diastereotopic methyl groups of DMF leads to two quadrupolar doublets with slightly shifted chemical shifts.

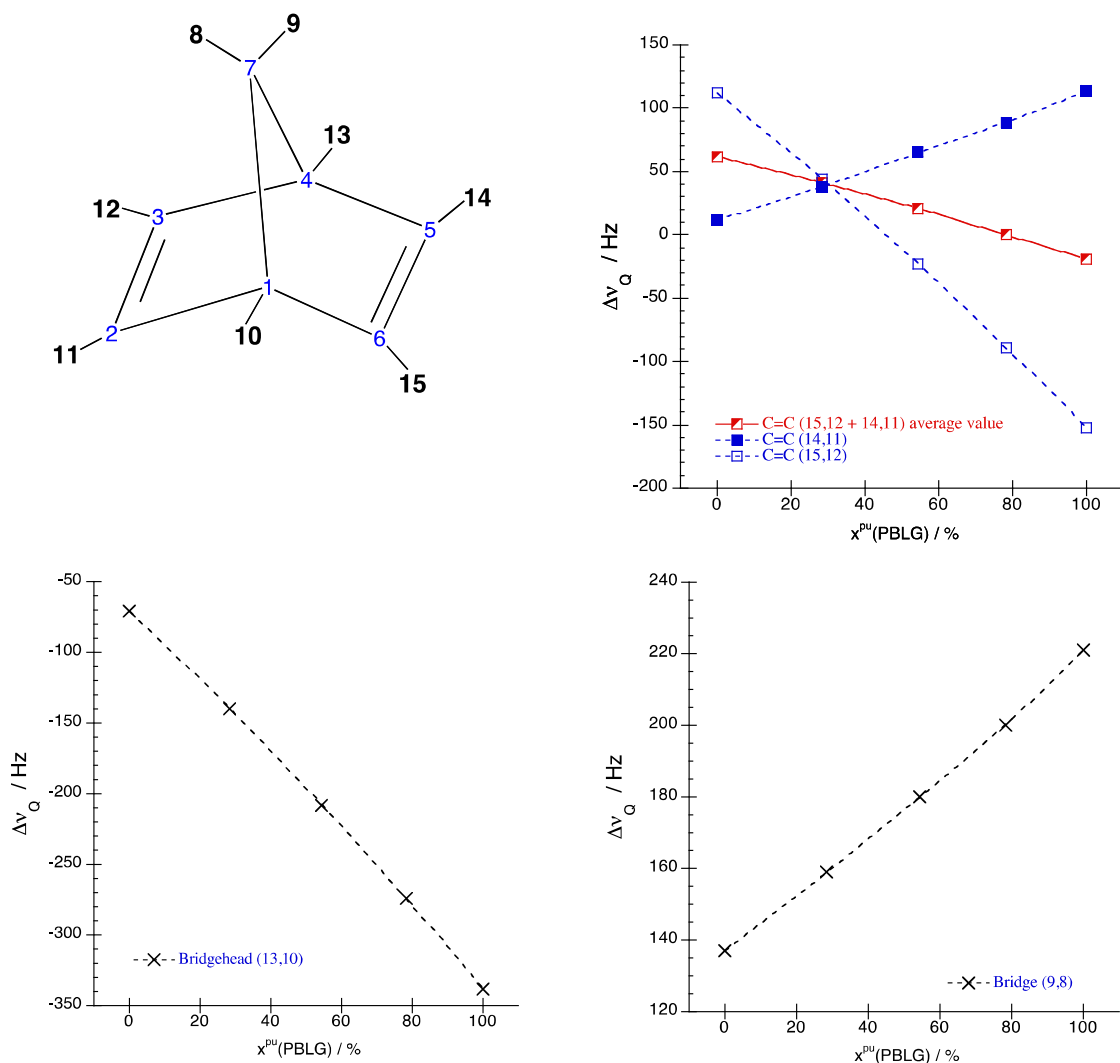

**Figure S2.** Variation of  $\Delta v_Q$  versus  $x^{\text{pu}}(\text{PBLG})$  (%) of all deuterium sites of **NBD** (Series I). Continuous lines correspond to the expected variation of RQC's for enantiotopic directions that would be obtained in the achiral system (PBG/PCBL). Open and black symbols using here correspond to the labels displayed in **Figure 1b**. Continuous lines show the expected variation of RQC's for enantiotopic directions that would be obtained in the achiral oriented system «PBG/PCBL».

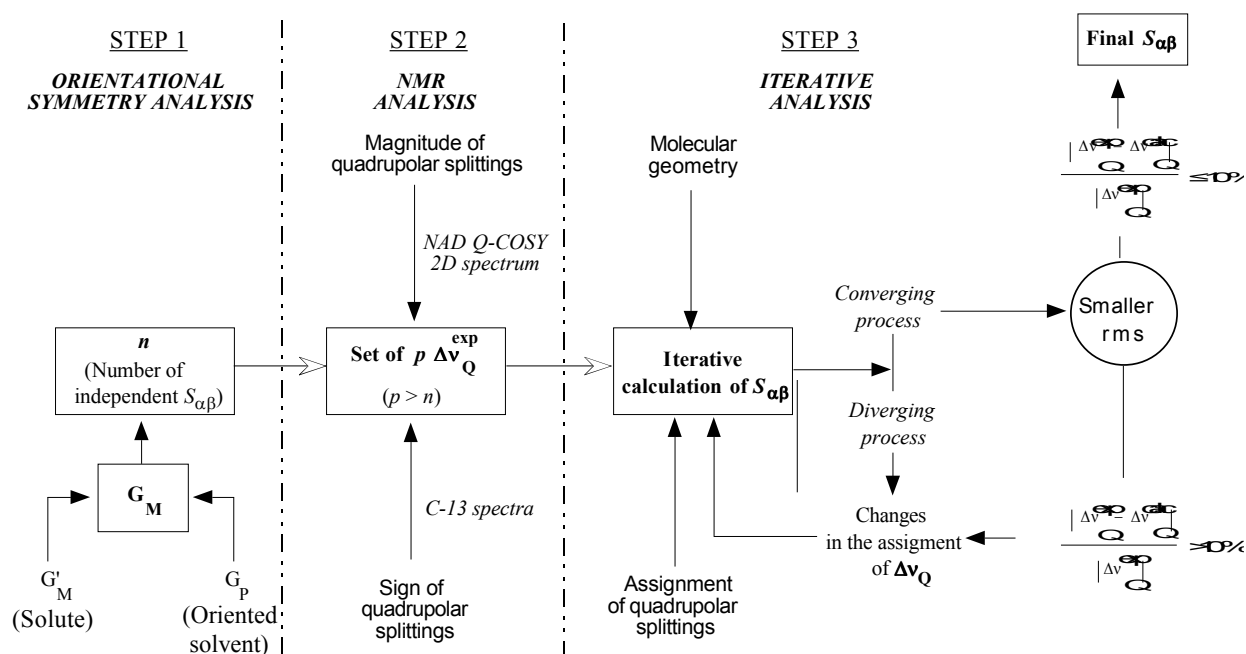

**Figure S3.** Flow chart showing the three-step analytical procedure adopted for the analysis of **NBD** dissolved in polypeptide mesophases through NAD 2D NMR. Signs of RQC are determined by comparison of proton coupled  $^{13}\text{C}$  spectra recorded in isotropic and anisotropic solvents.



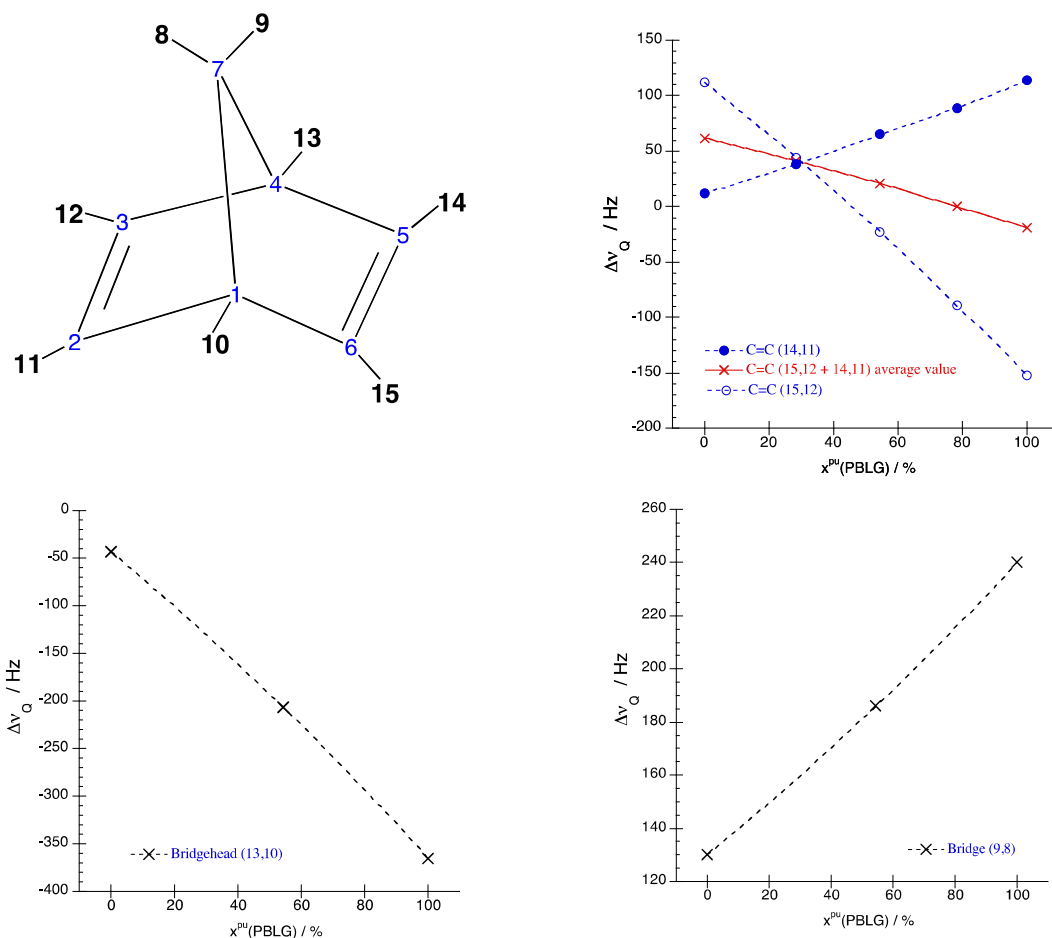

**Figure S4.** Variation of  $\Delta v_Q$  versus  $x^{PBLG}$  (%) of all deuterium sites of **NBD** (Series II). Continuous lines correspond to the expected variation of  $\Delta v_Q$  for enantiotopic directions that would be obtained in the achiral system (PBG/PCBL). Open and black circles used on graphs correspond to the labels displayed in **Figure 5**.
